# Supplementary material for: Rigid Jeffamine-included polyrotaxane as hydrogen-bond template for salicylideneazine with aggregation-enhanced emission
Source: Royal Society of Chemistry journal article supplement (doi:10.1039/c5ra05215g), 2015-01-01
Supplement: c5ra05215g1.pdf [file c5ra05215g1.pdf]

Supporting information

**Rigid Jeffamine-included polyrotaxane as hydrogen-bond template  
for salicylideneazine with aggregation-enhanced emission**

Po-Chiao Huang, Li-Yang Lin, Deng-Jie Yang, and Jin-Long Hong\*

Department of Materials and Optoelectronic Science

National Sun Yat-Sen University

Kaohsiung, Taiwan 80424

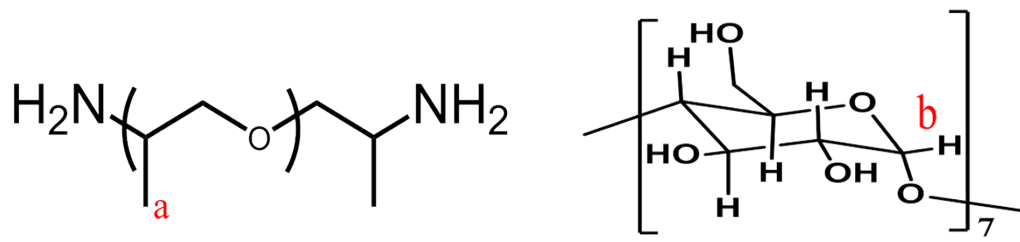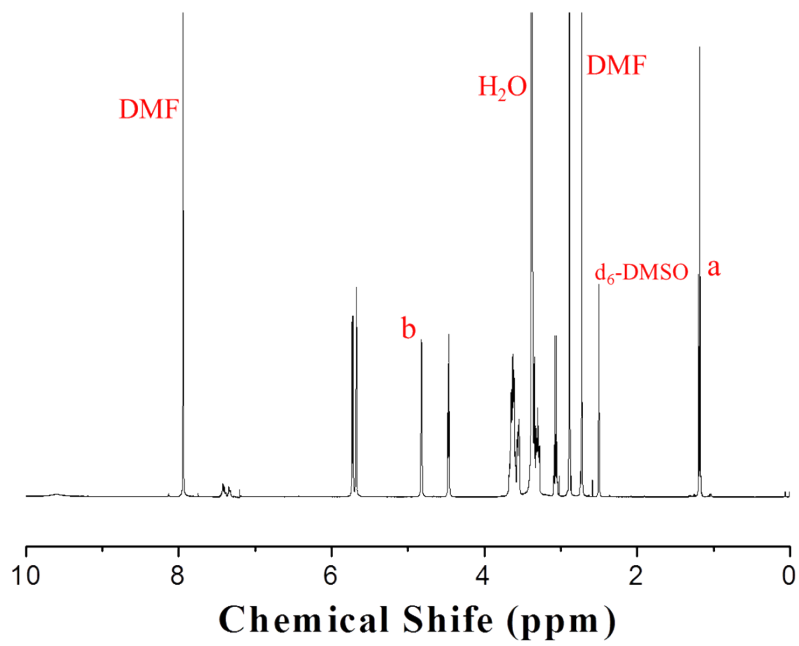

**Figure S1**  $^1\text{H}$  NMR spectra of JCD ( $10^{-3}$  M) ( $\text{d}_6\text{-DMSO}$ ).

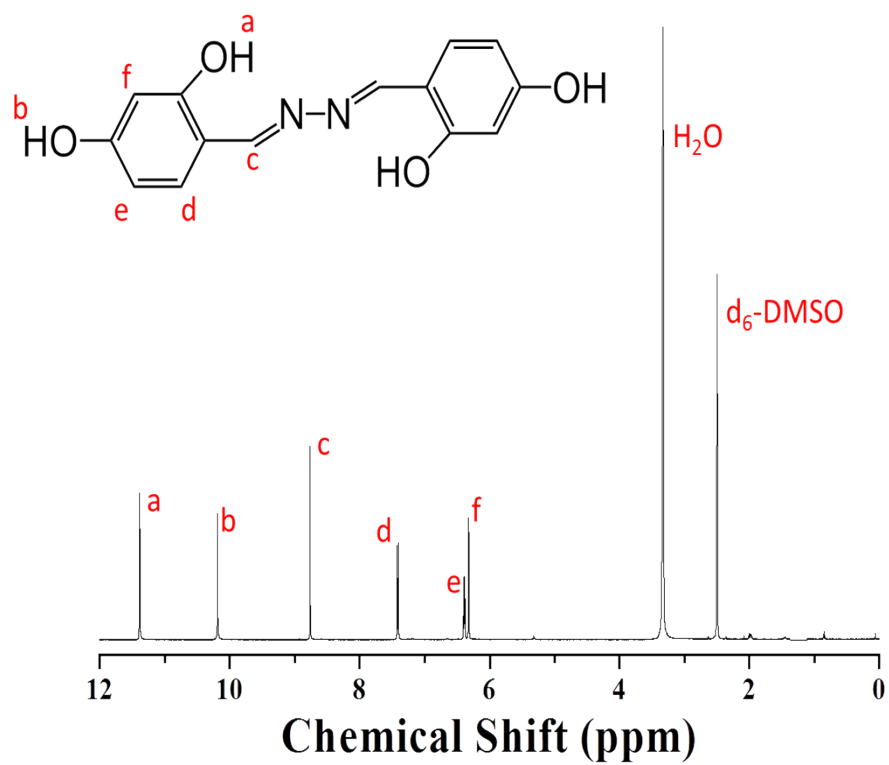

**Figure S2** <sup>1</sup>H NMR spectra of CN4OH (10<sup>-3</sup> M) (d<sub>6</sub>-DMSO).

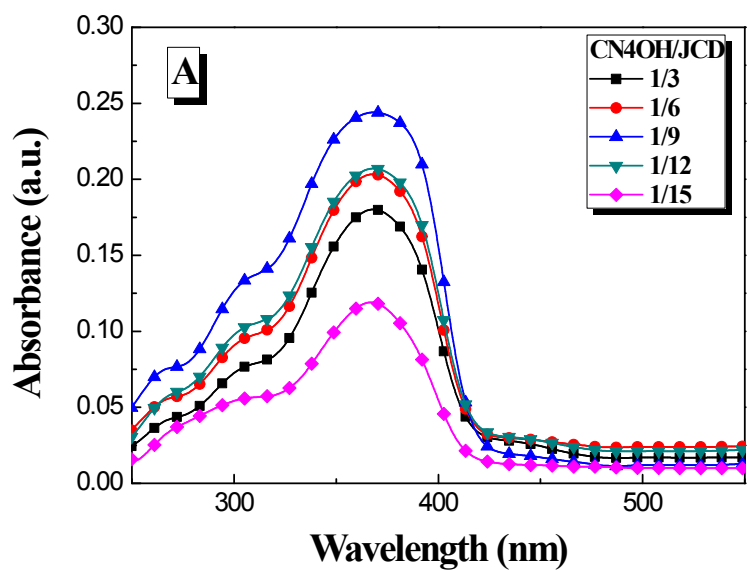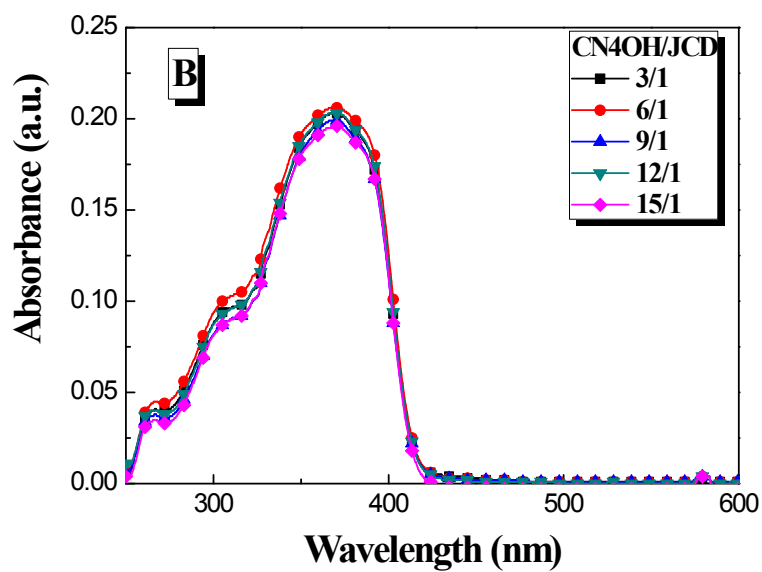

**Figure S3** Solution absorption spectra of CN4OH/JCD( $x/y$ ) with (A)  $x/y < 1$  and (B)  $x/y > 1$  mixtures with a constant concentration of CN4OH ( $= 10^{-3}$  M) in DMSO.

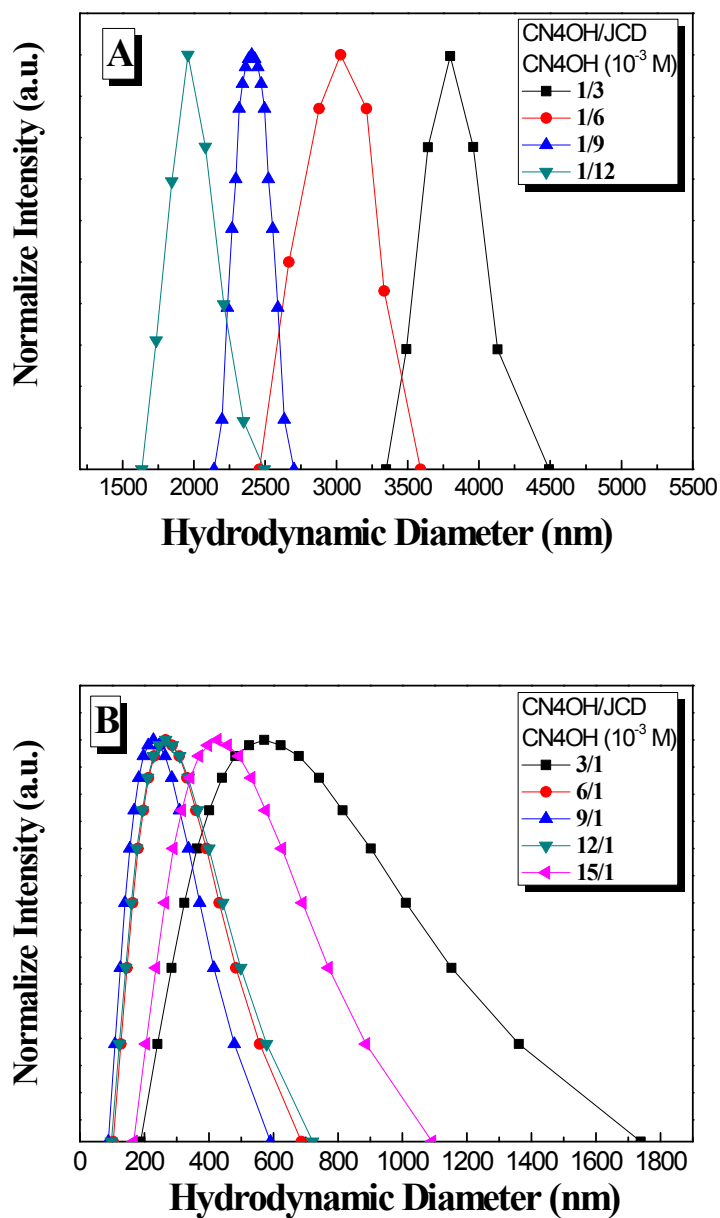

**Figure S4** Hydrodynamic size histogram of CN4OH/JCD( $x/y$ ) with (A)  $x/y < 1$  and (B)  $x/y > 1$  mixtures with a constant concentration of CN4OH ( $= 10^{-3}$  M) in DMSO.
